# Supplementary material for: No Evidence for Seed Transmission of Tomato Yellow Leaf Curl Sardinia Virus in Tomato
Source: MDPI journal article supplement (doi:10.3390/cells10071673), 2021-07-02
Supplement: s1 [file s1]

Tabein et al  
Supplementary Table 1

Supplementary Table 1. Raw data relative to the quantification of TYLCSV DNA by qPCR in tissues derived from different plant organs (see Figure 3B).

| Sample | Ct <i>TYLCSV</i> | Ct <i>apx</i> | $\Delta\text{Ct (apx-TYLCSV)}$ | $\Delta\text{Ct Average}$ |
|--------|------------------|---------------|--------------------------------|---------------------------|
| LEAF   | 8,18             | 33,13         | 24,95                          | 25,187                    |
| LEAF   | 7,98             | 33,33         | 25,35                          |                           |
| LEAF   | 8,2              | 33,46         | 25,26                          |                           |
| PETAL  | 6,99             | 32,63         | 25,64                          | 25,933                    |
| PETAL  | 6,4              | 32,64         | 26,24                          |                           |
| PETAL  | 7,01             | 32,93         | 25,92                          |                           |
| SEPAL  | 6,71             | 33,04         | 26,33                          | 26,623                    |
| SEPAL  | 6,23             | 33,04         | 26,81                          |                           |
| SEPAL  | 6,31             | 33,04         | 26,73                          |                           |
| PISTIL | 7,92             | 33,53         | 25,61                          | 25,457                    |
| PISTIL | 8,08             | 33,28         | 25,2                           |                           |
| PISTIL | 7,84             | 33,4          | 25,56                          |                           |
| STAMEN | 11,13            | 36,08         | 24,95                          | 25,020                    |
| STAMEN | 10,85            | 36,29         | 25,44                          |                           |
| STAMEN | 11,51            | 36,18         | 24,67                          |                           |
| EMBRYO | 23,82            | 36,18         | 12,36                          | 12,467                    |
| EMBRYO | 23,84            | 36,27         | 12,43                          |                           |
| EMBRYO | 23,92            | 36,53         | 12,61                          |                           |
| SEED   | 15,12            | 34,82         | 19,7                           | 19,773                    |
| SEED   | 15,2             | 35,15         | 19,95                          |                           |
| SEED   | 15,49            | 35,29         | 19,8                           |                           |
| SEED   | 14,3             | 34,18         | 19,88                          |                           |
| SEED   | 14,04            | 33,91         | 19,87                          |                           |
| SEED   | 14,59            | 34,03         | 19,44                          |                           |
| SEED   |                  |               |                                |                           |

Tabein et al  
Supplementary Figure 1

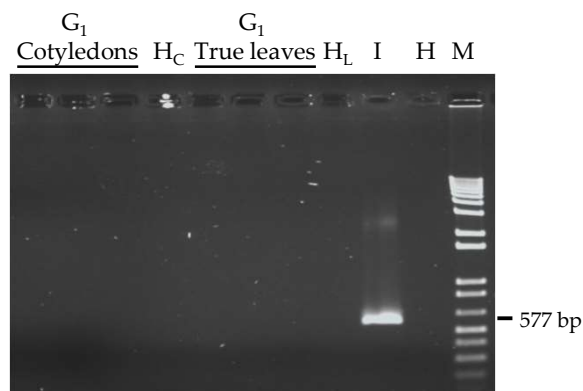

**Supplementary Figure 1.** PCR analysis of Generation 1 ( $G_1$ ) seedlings of the first grow out experiment. PCR was conducted on bulked extracts from both cotyledon and true leaves from three different TYLCSV-infected plants, using primers TY1(+)/TY2(-).  $H_c$  and  $H_l$  represent extracts from cotyledon or true leaf samples derived from healthy plants. H and I, healthy and TYLCSV infected plant, used as negative and positive controls, respectively. M, 1kb Plus DNA Ladder (Invitrogen).

Tabein et al  
Supplementary Figure 2

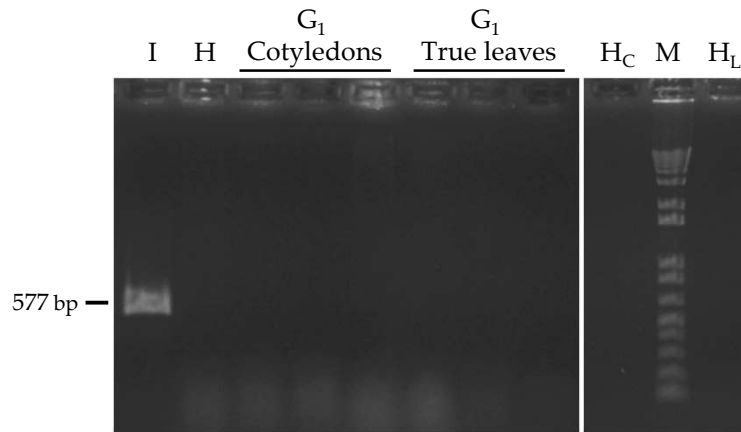

**Supplementary Figure 2.** Detection of TYLCSV DNA in Generation 1 ( $G_1$ ) seedlings of the first grow out experiment. PCR was conducted with primers TY1(+)/TY2(-) on RCA products obtained from bulked DNAs extracted from cotyledon and true leaves of three different TYLCSV-infected plants (20 individual samples each).  $H_c$  and  $H_l$ , PCR on RCA products obtained from bulked cotyledon or true leaf samples of  $G_1$  seedlings of an healthy plant. I and H, DNA extracts from an infected/healthy plant used as positive/negative control, respectively. M, 1kb Plus DNA Ladder (Invitrogen).

Tabein et al  
Supplementary Figure 3

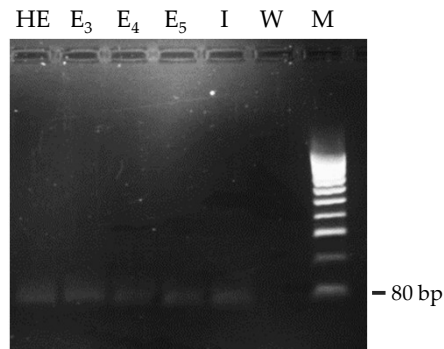

**Supplementary Figure 3.** Detection of the endogenous 25S ribosomal RNA (rRNA) gene (Acc. No. NR\_137326.1) in three different embryos batches (n=18-20, from three different plants) dissected from seeds of TYLCSV-infected plants. Before DNA extraction, embryos were surface sterilized for 5 minute in 1:10 commercial bleach and extensively washed with sterile water. PCR was conducted with primers UNIV25S\_rRNA(+) (5'-TCAGGTCTCCAAGGTGAACA-3') and UNIV25S\_rRNA(-) (5'-CCGAAGTTACGGATCCATTT-3'), generating an amplicon of 80 bp. HE, healthy embryos;; E<sub>3-5</sub>, embryos (three different batches); I, infected plant, positive control; W, water control; M, HyperLadder™ 100bp (Bioline).
